# Supplementary material
Source: publisher figshare collection journal article supplement (https://plos.figshare.com/articles/dataset/_/1482884)
Supplement: Supplementary file 1 [file 1]

Archive with 16 entries (16 files):
- S1_Fig.pdf
- S2_Fig.pdf
- S3_Fig.pdf
- S4_Fig.pdf
- S5_Fig.pdf
- S6_Fig.pdf
- S7_Fig.pdf
- S8_Fig.pdf
- S9_Fig.pdf
- S10_Fig.pdf
- S1_Table.xlsx
- S2_Table.xlsx
- S3_Table.xlsx
- S4_Table.xlsx
- S5_Table.docx
- S1_Text.docx
