# Supplementary material
Source: publisher figshare collection journal article supplement (https://plos.figshare.com/articles/dataset/_/1482884)
Supplement: Supplementary file 1 [file 1 › S1_Fig.pdf]

## Circular mtDNA genome

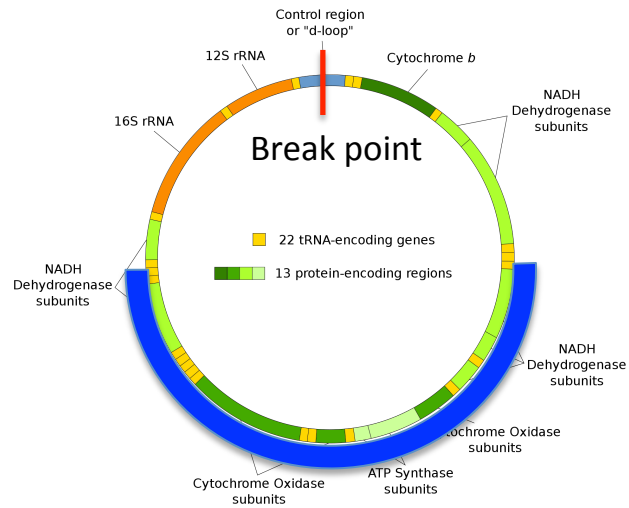

The linear rCRS reference genome

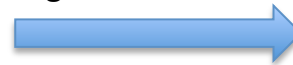

Align reads

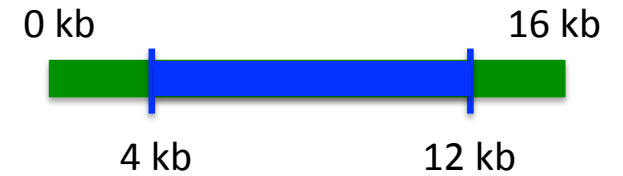

Call variants between 4kb to 12kb

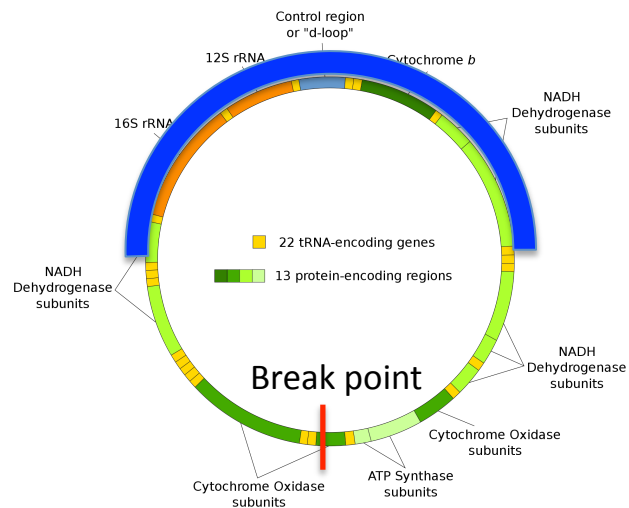

A "shifted" rCRS reference genome

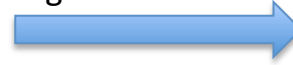

Align reads

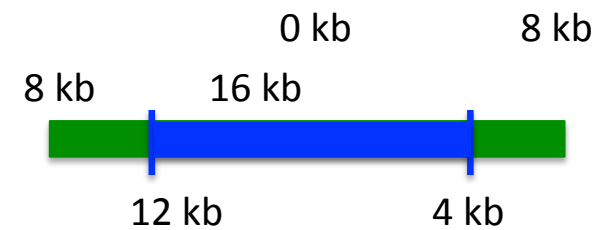

Call variants between 12kb to 16kb, and between 0kb to 4kb
