# Supplementary material
Source: publisher figshare collection journal article supplement (https://plos.figshare.com/articles/dataset/_/1482884)

**Histogram of the number of homoplas mies per person**

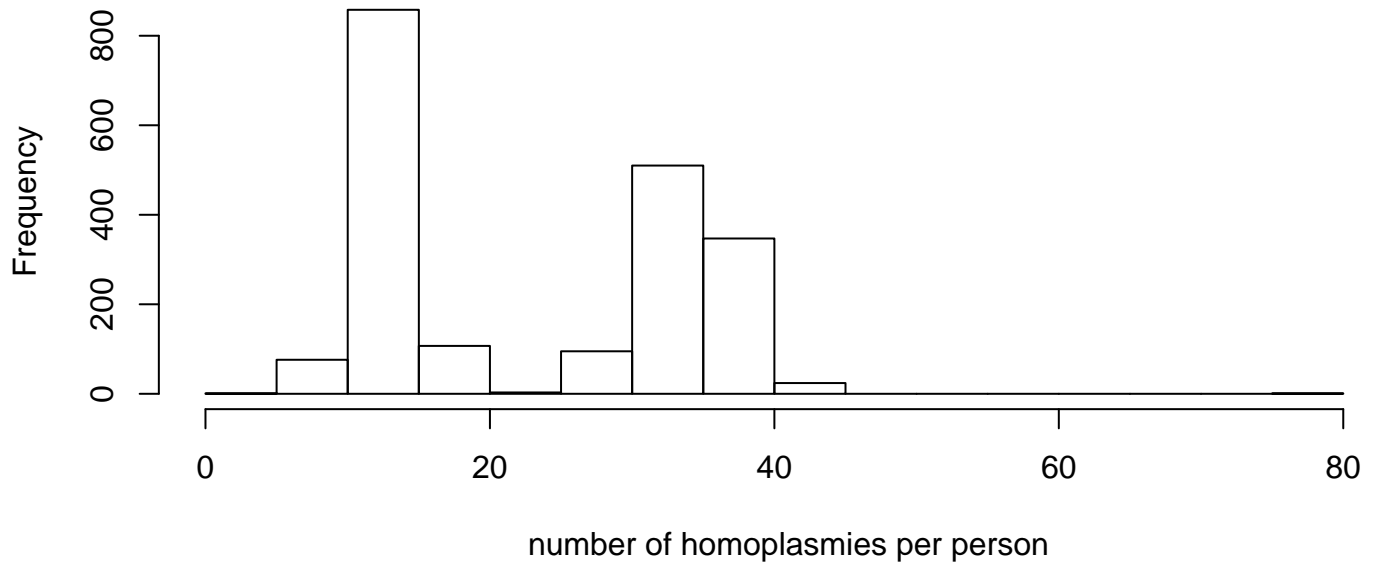

**Histogram of the number of heteroplas mies per person**

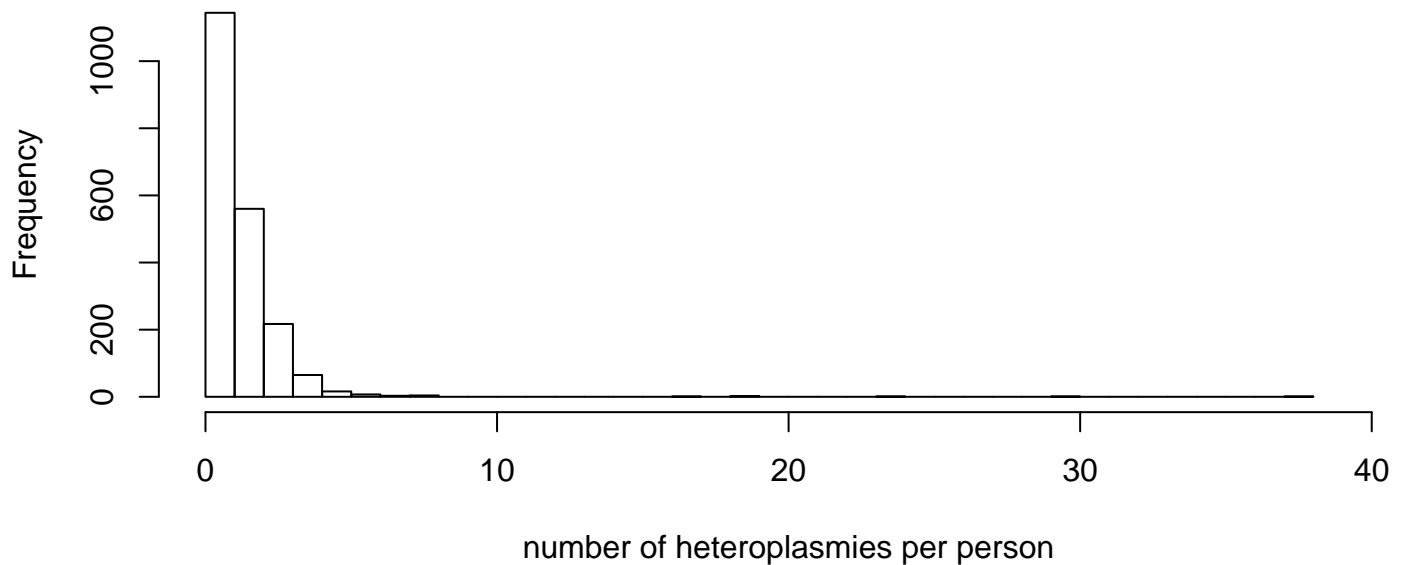

Supplement: Supplementary file 1 [file 1 › S3_Fig.pdf]
