# Supplementary material
Source: publisher figshare collection journal article supplement (https://plos.figshare.com/articles/dataset/_/1482884)
Supplement: Supplementary file 1 [file 1 › S3_Table.xlsx]

## Sheet: Sheet1
Study No.	1*	2*	3*	4#	5*	6	7
References	He et al., Nature 464, 610 (2010). (Ref 11)	Li et al., AJHG 87, 237 (2010). (Ref 12)	Goto et al., Genome Biol 12, R59 (2011). (Ref 17)	Abecasis et al., Nature 467, 1061 (2010). (Ref 4)	Ye et al., PNAS 111, 10654 (2014). (Ref 13)	Rebolledo-Jaramillo et al., PNAS 111, 15474 (2014). (Ref 18)	This study
Sequencing Technology	ILLUMINA ~16,700X	ILLUMINA 36 & 76 bp ~67 & ~211X	ILLUMINA ~1,170X	ILLUMINA, 454, SOLID, 38X~3535X	ILLUMINA, SOLID	ILLUMINA ~20,000X	ILLUMINA ~180X
Mapping Tools	Eland	MIA	BWA	multiple aiignment softwares	GSNAP, remapping	BWA	BWA
Mismatches	<= 3 in 36 bp	Default	Default	--	Default or 7%	<=2 mismatches per 100bp	Default (<=5)
Reads	remove low-quality reads	remove duplicate reads & low-quality reads	--	--	Only reads originally mapped to mtDNA by 1000 genome project	remove duplicate reads	remove duplicate reads
Mapping	--	--	Unique	--	Unique	Unique (MAPQ>=20)	Unique (MAPQ>=20)
Base Quality	>=23 for all bases in the read	>= 20 on site, >= 15 for 5 bp flanking	>= 30 on site	--	>=20 on site	>=30 on site	>=20 on site
Minimum Depth	>= 10 distinct reads	--	>= 100X HQ depth on each strand	--	>= 10X HQ depth on each strand	>=1,000X	>=40X raw depth, >=10X HQ depth
Double Strand Validation	>=3 reads on each strand	>= 1 read on each strand	>=100 HQ depth on each strand, >= 2% raw frequency on each strand	--	>= 2 reads on each strand, >=1% raw frequency on each strand	--	>=1 read on each strand
Minor allele frequency	>=1.6%	>=10%	>= 2% on each strand	>=10%	>=1% on each strand	>=1%	>=4%
* Table contents for these studies were adapted from Supplementary Table S2 of Ye et al., PNAS 111, 10654 (2014). (Ref 13)
# Results of mtDNA variation were presented in the Supplementary Materials of this study, with very limited information.
