# Supplementary material
Source: publisher figshare collection journal article supplement (https://plos.figshare.com/articles/dataset/_/1482884)
Supplement: Supplementary file 1 [file 1 › S4_Table.xlsx]

## Sheet: momkid_overlap_heteroTable_with
Position	Reference	Child.ID	Child.Genotype	Child.Allele_Fraction	Child.AAF	Mother.ID	Mother.Genotype	Mother.Allele_Fraction	Mother.AAF
9676	A	1044	A/G	0.6211/0.3789	0.3789	1043	A/G	0.2868/0.7132	0.7132
16167	C	11228	C/T	0.2752/0.7248	0.7248	12691	C/T	0.7325/0.2675	0.2675
911	T	1178	C/T	0.0756/0.9244	0.0756	2784	C/T	0.0922/0.9078	0.0922
15596	G	11810	A/G	0.2885/0.7115	0.2885	11808	A/G	0.0610/0.9390	0.061
4991	G	12667	A/G	0.0517/0.9483	0.0517	12666	A/G	0.0532/0.9468	0.0532
13413	A	1502	A/G	0.8041/0.1959	0.1959	1500	A/G	0.7006/0.2994	0.2994
3943	A	1634	A/G	0.7001/0.2999	0.2999	1631	A/G	0.9473/0.0527	0.0527
13760	C	16553	C/T	0.3052/0.6948	0.6948	4594	C/T	0.7170/0.2830	0.283
14325	T	1715	C/T	0.8840/0.1160	0.884	1713	C/T	0.7217/0.2783	0.7217
709	G	1798	A/G	0.2992/0.7008	0.2992	1795	A/G	0.1787/0.8213	0.1787
183	A	19035	A/G	0.8952/0.1048	0.1048	19038	A/G	0.9191/0.0809	0.0809
16167	C	1985	C/T	0.6063/0.3937	0.3937	1984	C/T	0.2202/0.7798	0.7798
12674	A	21560	A/G	0.3113/0.6887	0.6887	21337	A/G	0.3238/0.6762	0.6762
3459	C	2218	C/T	0.5000/0.5000	0.5	2215	C/T	0.5230/0.4770	0.477
16256	C	23649	C/T	0.1160/0.8840	0.884	22835	C/T	0.8429/0.1571	0.1571
64	C	23649	C/T	0.0936/0.9064	0.9064	22835	C/T	0.8036/0.1964	0.1964
15254	G	23935	A/G	0.1535/0.8465	0.1535	22853	A/G	0.0744/0.9256	0.0744
1422	G	2514	A/G	0.0910/0.9090	0.091	2513	A/G	0.3637/0.6363	0.3637
16294	C	2514	C/T	0.1674/0.8326	0.8326	2513	C/T	0.4217/0.5783	0.5783
15262	T	2665	C/T	0.4588/0.5412	0.4588	2664	C/T	0.7059/0.2941	0.7059
11353	T	27328	C/T	0.0858/0.9142	0.0858	27316	C/T	0.0836/0.9164	0.0836
16362	T	28346	C/T	0.1275/0.8725	0.1275	28341	C/T	0.1077/0.8923	0.1077
16320	C	28554	C/T	0.9546/0.0454	0.0454	21138	C/T	0.9484/0.0516	0.0516
16192	C	2855	C/T	0.2331/0.7669	0.7669	2854	C/T	0.0447/0.9553	0.9553
13760	C	29946	C/T	0.0792/0.9208	0.9208	16553	C/T	0.3052/0.6948	0.6948
6465	G	30573	A/G	0.3336/0.6664	0.3336	24372	A/G	0.3876/0.6124	0.3876
13143	T	30907	C/T	0.2506/0.7494	0.2506	30906	C/T	0.2903/0.7097	0.2903
15314	G	31086	A/G	0.6075/0.3925	0.6075	35300	A/G	0.7185/0.2815	0.7185
12523	A	32870	A/G	0.7702/0.2298	0.2298	18068	A/G	0.8269/0.1731	0.1731
16124	T	33348	C/T	0.3566/0.6434	0.3566	31440	C/T	0.7606/0.2394	0.7606
11053	A	33834	A/G	0.4032/0.5968	0.5968	18540	A/G	0.6390/0.3610	0.361
16309	A	33834	A/G	0.5359/0.4641	0.4641	18540	A/G	0.9186/0.0814	0.0814
5581	A	36338	A/G	0.8925/0.1075	0.1075	36337	A/G	0.5700/0.4300	0.43
6750	C	36459	C/T	0.3793/0.6207	0.6207	36460	C/T	0.3860/0.6140	0.614
14207	G	369	A/G	0.0737/0.9263	0.0737	367	A/G	0.3029/0.6971	0.3029
9128	T	37157	C/T	0.4425/0.5575	0.4425	37264	C/T	0.5230/0.4770	0.523
9128	T	37158	C/T	0.2885/0.7115	0.2885	37264	C/T	0.5230/0.4770	0.523
9128	T	37159	C/T	0.5670/0.4330	0.567	37157	C/T	0.4425/0.5575	0.4425
3951	C	37550	C/T	0.7438/0.2562	0.2562	37547	C/T	0.8227/0.1773	0.1773
146	T	37559	C/T	0.1959/0.8041	0.1959	37412	C/T	0.3879/0.6121	0.3879
189	A	37698	A/G	0.8449/0.1551	0.1551	37723	A/G	0.9592/0.0408	0.0408
204	T	37698	C/T	0.0592/0.9408	0.0592	37723	C/T	0.0525/0.9475	0.0525
9804	G	38466	A/G	0.2460/0.7540	0.246	38460	A/G	0.4449/0.5551	0.4449
14869	G	38764	A/G	0.1264/0.8736	0.1264	38670	A/G	0.1351/0.8649	0.1351
1673	T	38909	C/T	0.7992/0.2008	0.7992	38908	C/T	0.5554/0.4446	0.5554
14016	G	39095	A/G	0.6006/0.3994	0.6006	39023	A/G	0.2546/0.7454	0.2546
5054	G	39156	A/G	0.4577/0.5423	0.4577	15110	A/G	0.8643/0.1357	0.8643
14386	T	39240	C/T	0.6395/0.3605	0.6395	39125	C/T	0.2406/0.7594	0.2406
152	T	3943	C/T	0.5306/0.4694	0.5306	3940	C/T	0.7896/0.2104	0.7896
7444	G	40760	A/G	0.0880/0.9120	0.088	40761	A/G	0.4665/0.5335	0.4665
5147	G	41126	A/G	0.5843/0.4157	0.5843	41125	A/G	0.4815/0.5185	0.4815
16352	T	42108	C/T	0.2541/0.7459	0.2541	42107	C/T	0.1347/0.8653	0.1347
183	A	42108	A/G	0.3074/0.6926	0.6926	42107	A/G	0.7267/0.2733	0.2733
10245	T	42971	C/T	0.1558/0.8442	0.1558	42958	C/T	0.1119/0.8881	0.1119
15562	A	42971	A/G	0.8420/0.1580	0.158	42958	A/G	0.9397/0.0603	0.0603
2735	G	42971	A/G	0.1399/0.8601	0.1399	42958	A/G	0.1520/0.8480	0.152
3591	G	43071	A/G	0.9407/0.0593	0.9407	43069	A/G	0.8127/0.1873	0.8127
16301	C	4528	C/T	0.8003/0.1997	0.1997	4526	C/T	0.6813/0.3187	0.3187
9185	T	4582	C/T	0.7087/0.2913	0.7087	4581	C/T	0.2850/0.7150	0.285
12940	G	5107	A/G	0.9141/0.0859	0.9141	5104	A/G	0.8785/0.1215	0.8785
146	T	5206	C/T	0.7362/0.2638	0.7362	14	C/T	0.4881/0.5119	0.4881
146	T	5446	C/T	0.0766/0.9234	0.0766	5445	C/T	0.2953/0.7047	0.2953
8639	T	55	C/T	0.1206/0.8794	0.1206	54	C/T	0.1482/0.8518	0.1482
6260	G	5902	A/G	0.0624/0.9376	0.0624	5900	A/G	0.2362/0.7638	0.2362
14161	A	7215	A/G	0.9146/0.0854	0.0854	7214	A/G	0.9053/0.0947	0.0947
14530	T	834	C/T	0.4287/0.5713	0.4287	833	C/T	0.5912/0.4088	0.5912
