# Supplementary material
Source: publisher figshare collection journal article supplement (https://plos.figshare.com/articles/dataset/_/1482884)

**Coverage of 22 chromosomes for 100 samples**

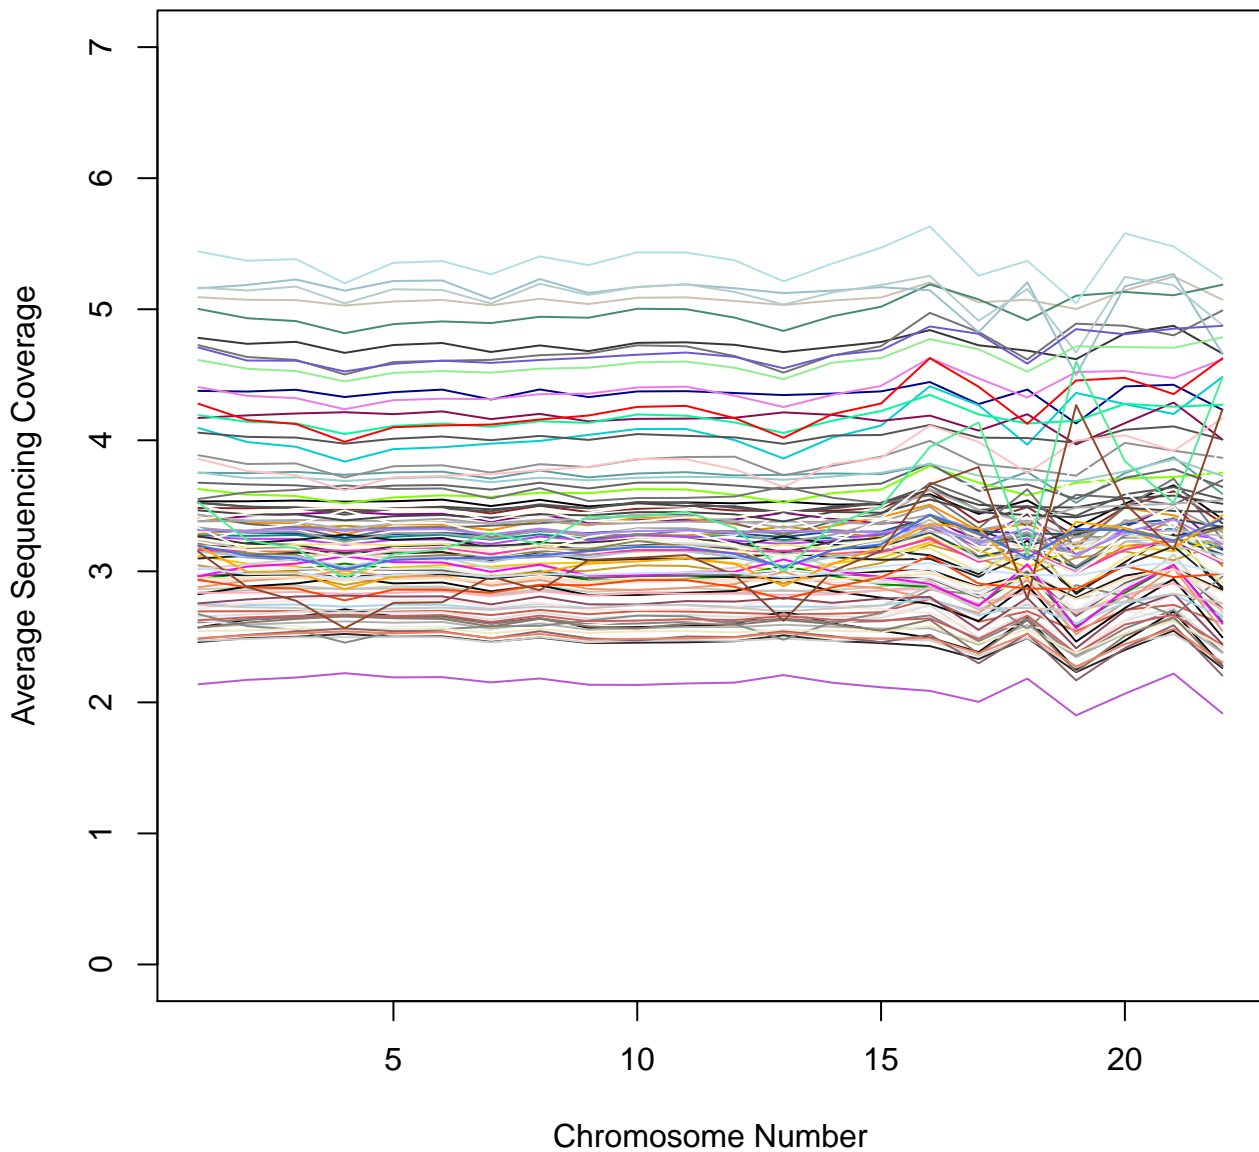

Supplement: Supplementary file [file 1]
