# Supplementary material
Source: publisher figshare collection journal article supplement (https://plos.figshare.com/articles/dataset/_/1482884)

**Coverage of 22 chromosomes for 100 samples**

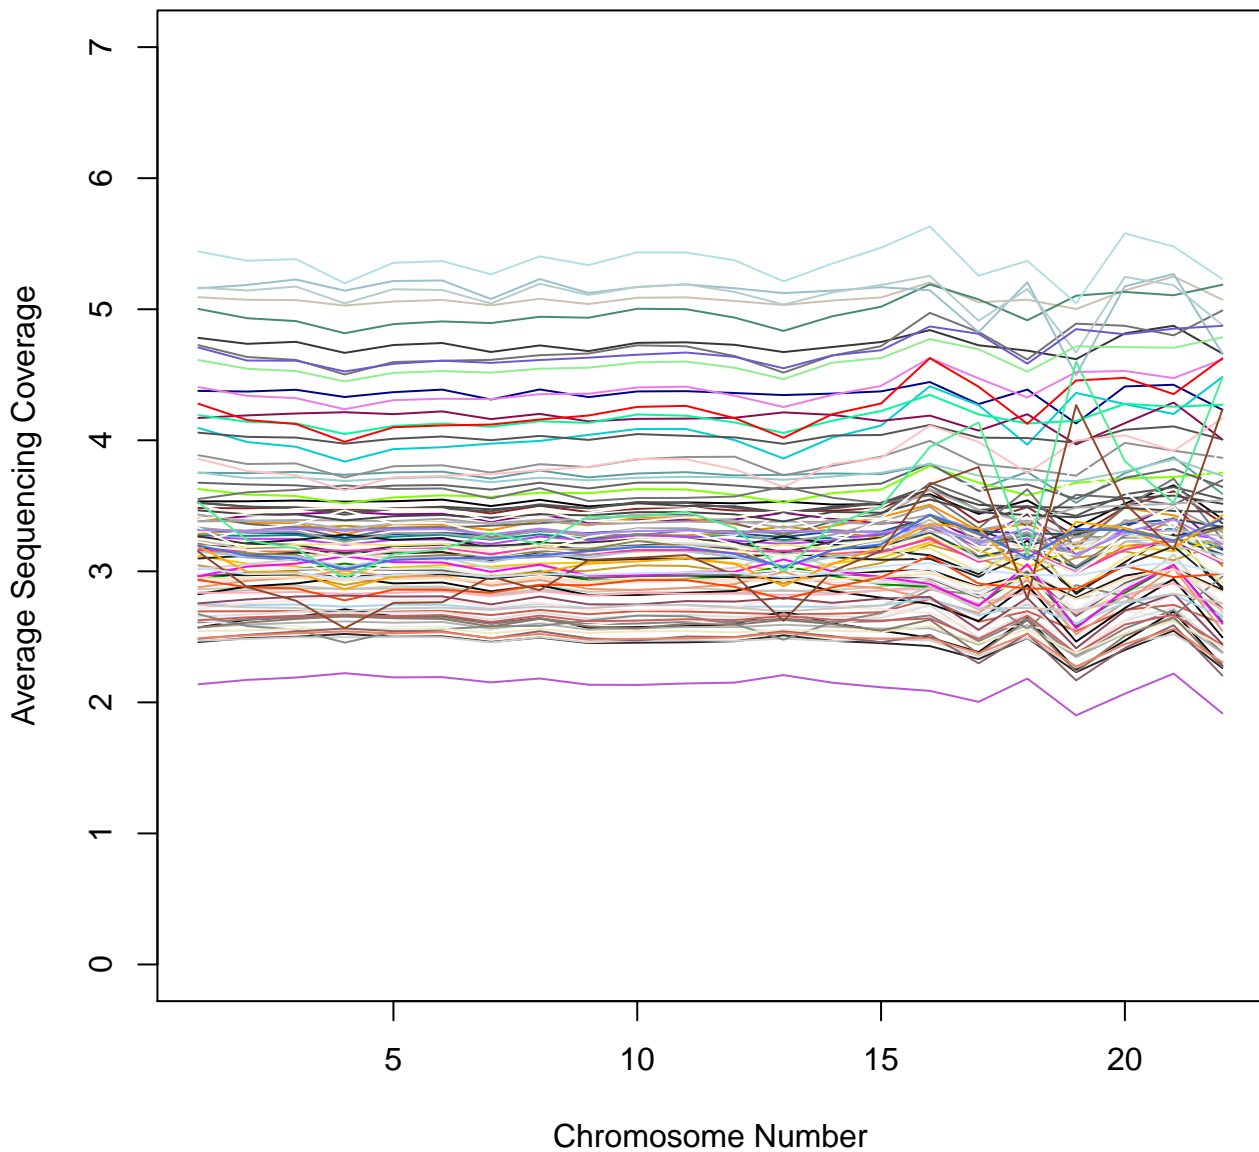

Supplement: Supplementary file 1 [file 1 › S2_Fig.pdf]

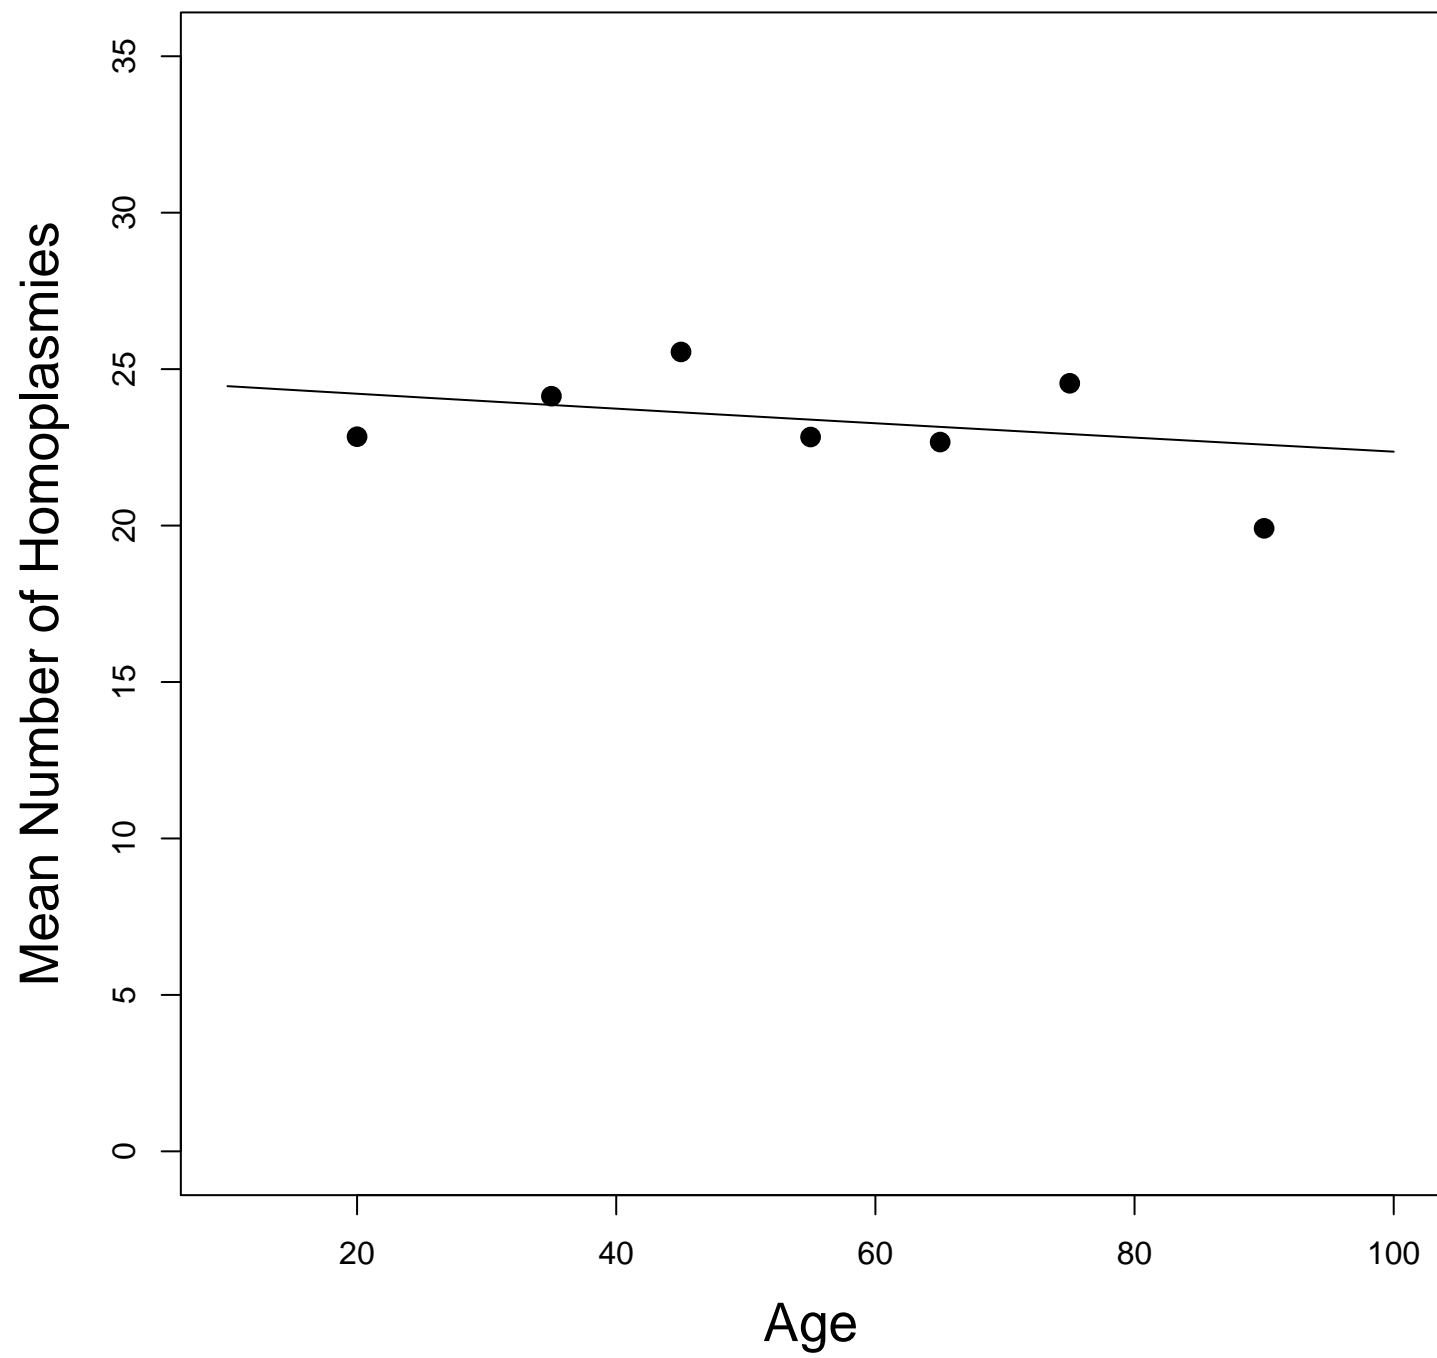

Supplement: Supplementary file 1 [file 1 › S4_Fig.pdf]

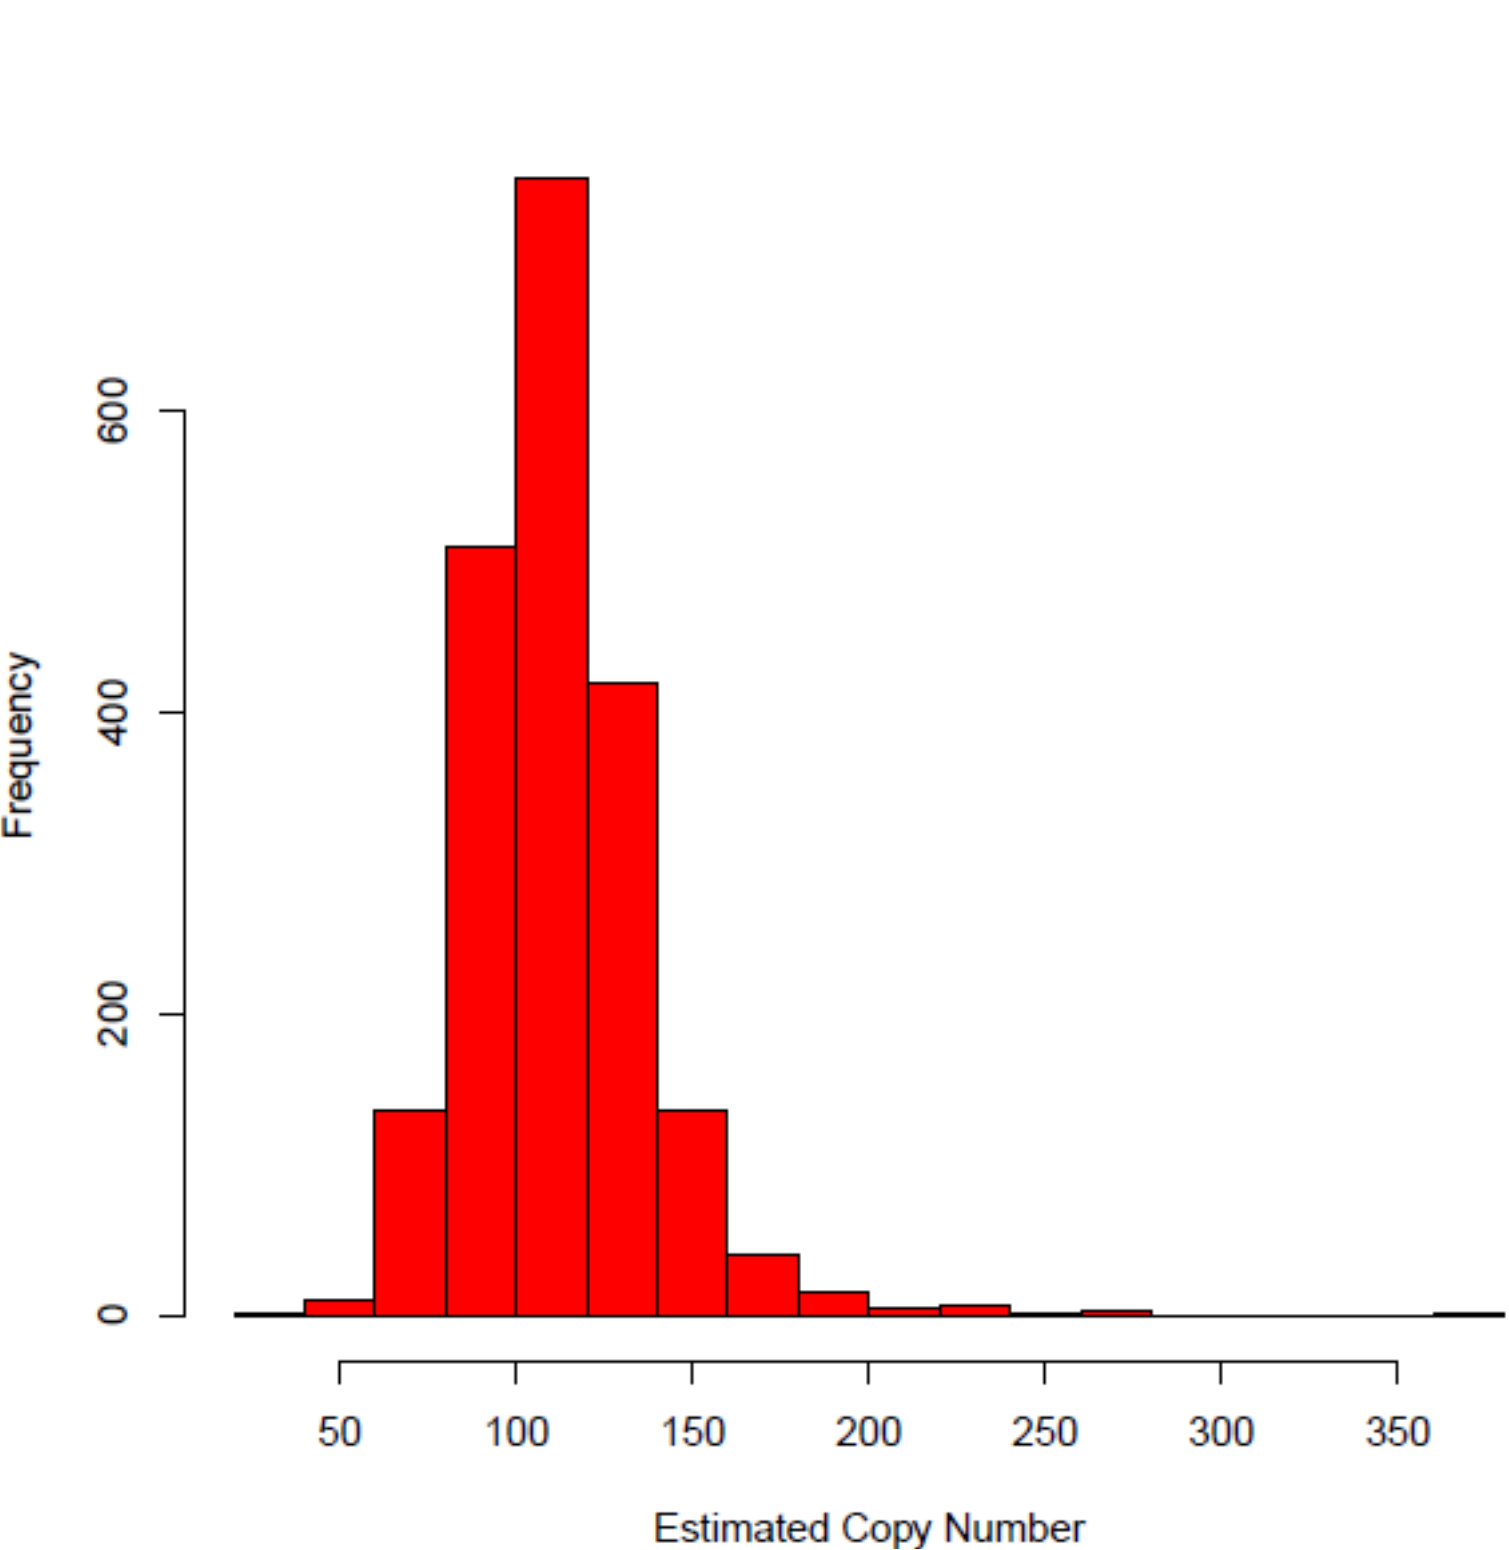

Supplement: Supplementary file 1 [file 1 › S5_Fig.pdf]

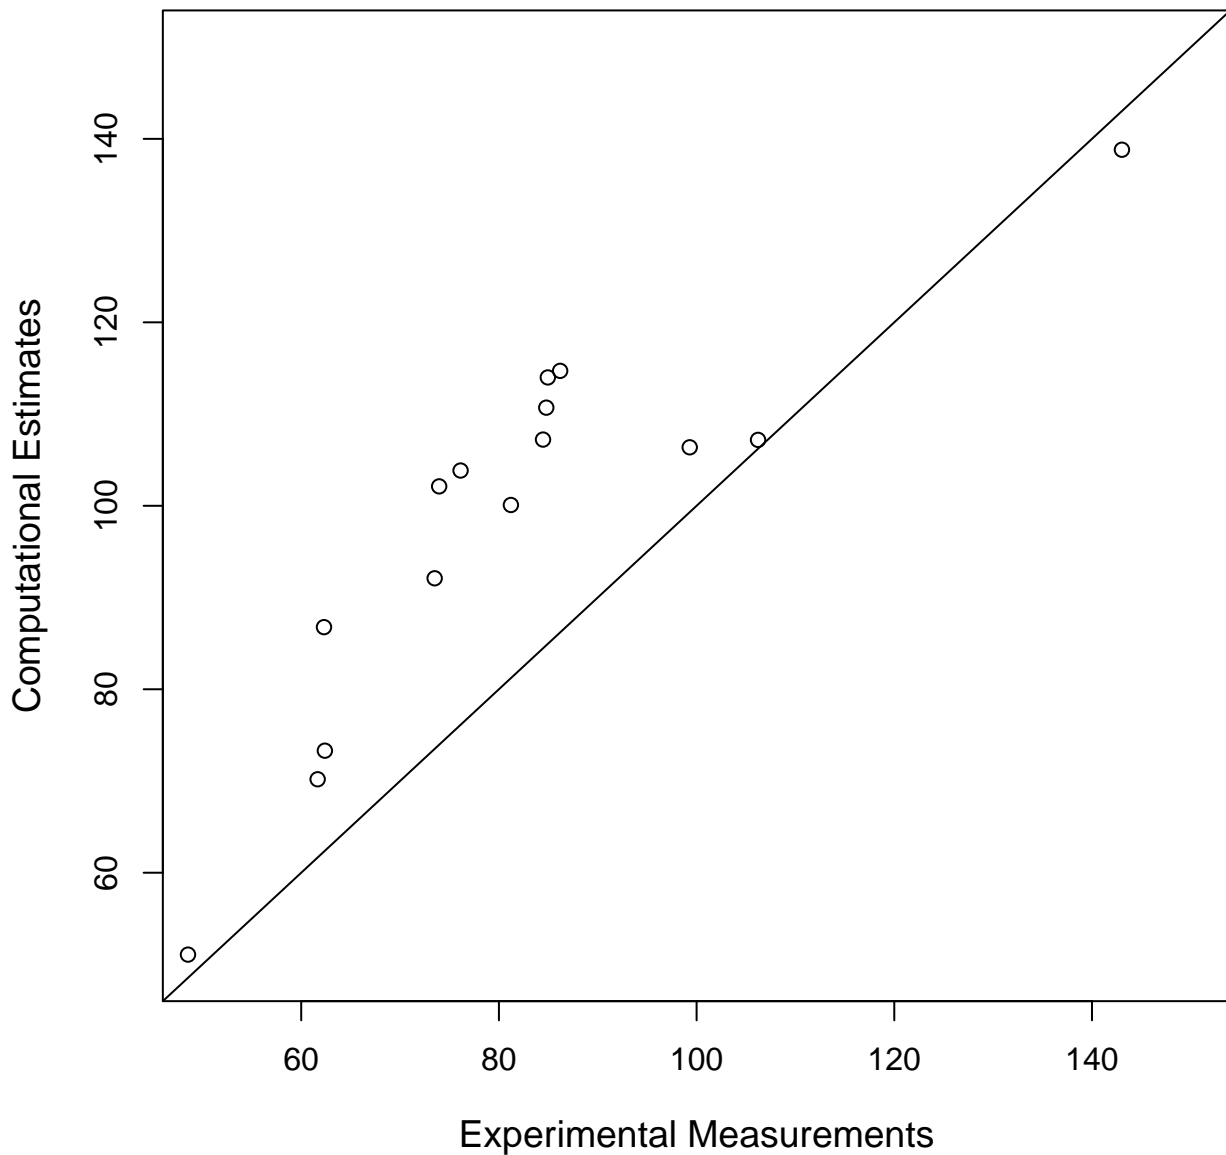

Supplement: Supplementary file 1 [file 1 › S6_Fig.pdf]

**Age versus Estimated Copy Number of 2000 Samples**

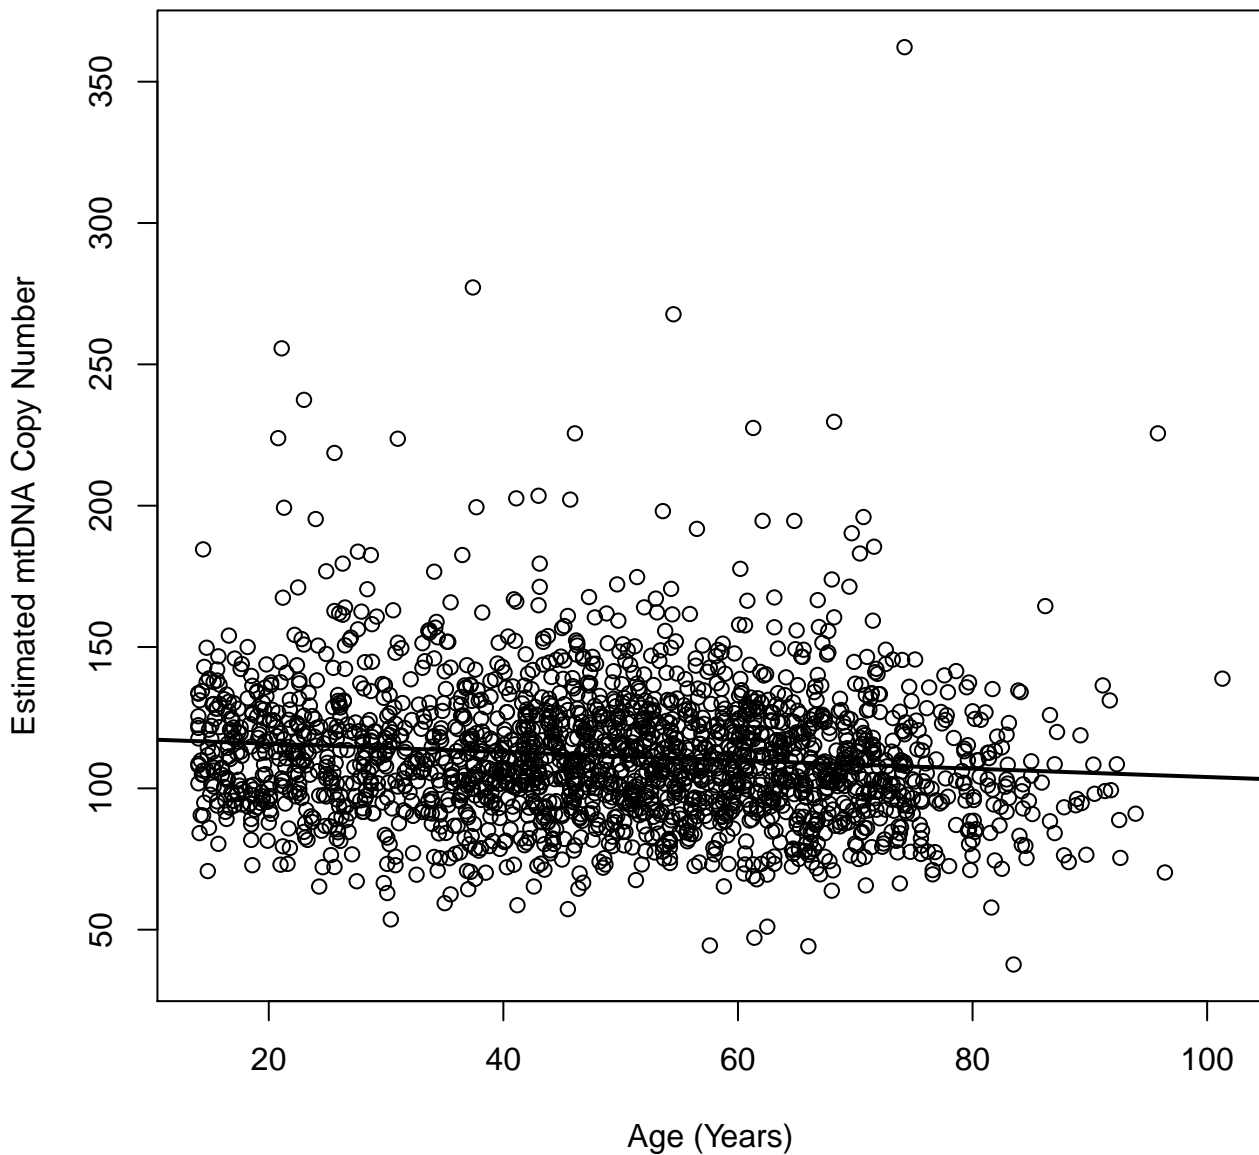

Supplement: Supplementary file 1 [file 1 › S7_Fig.pdf]

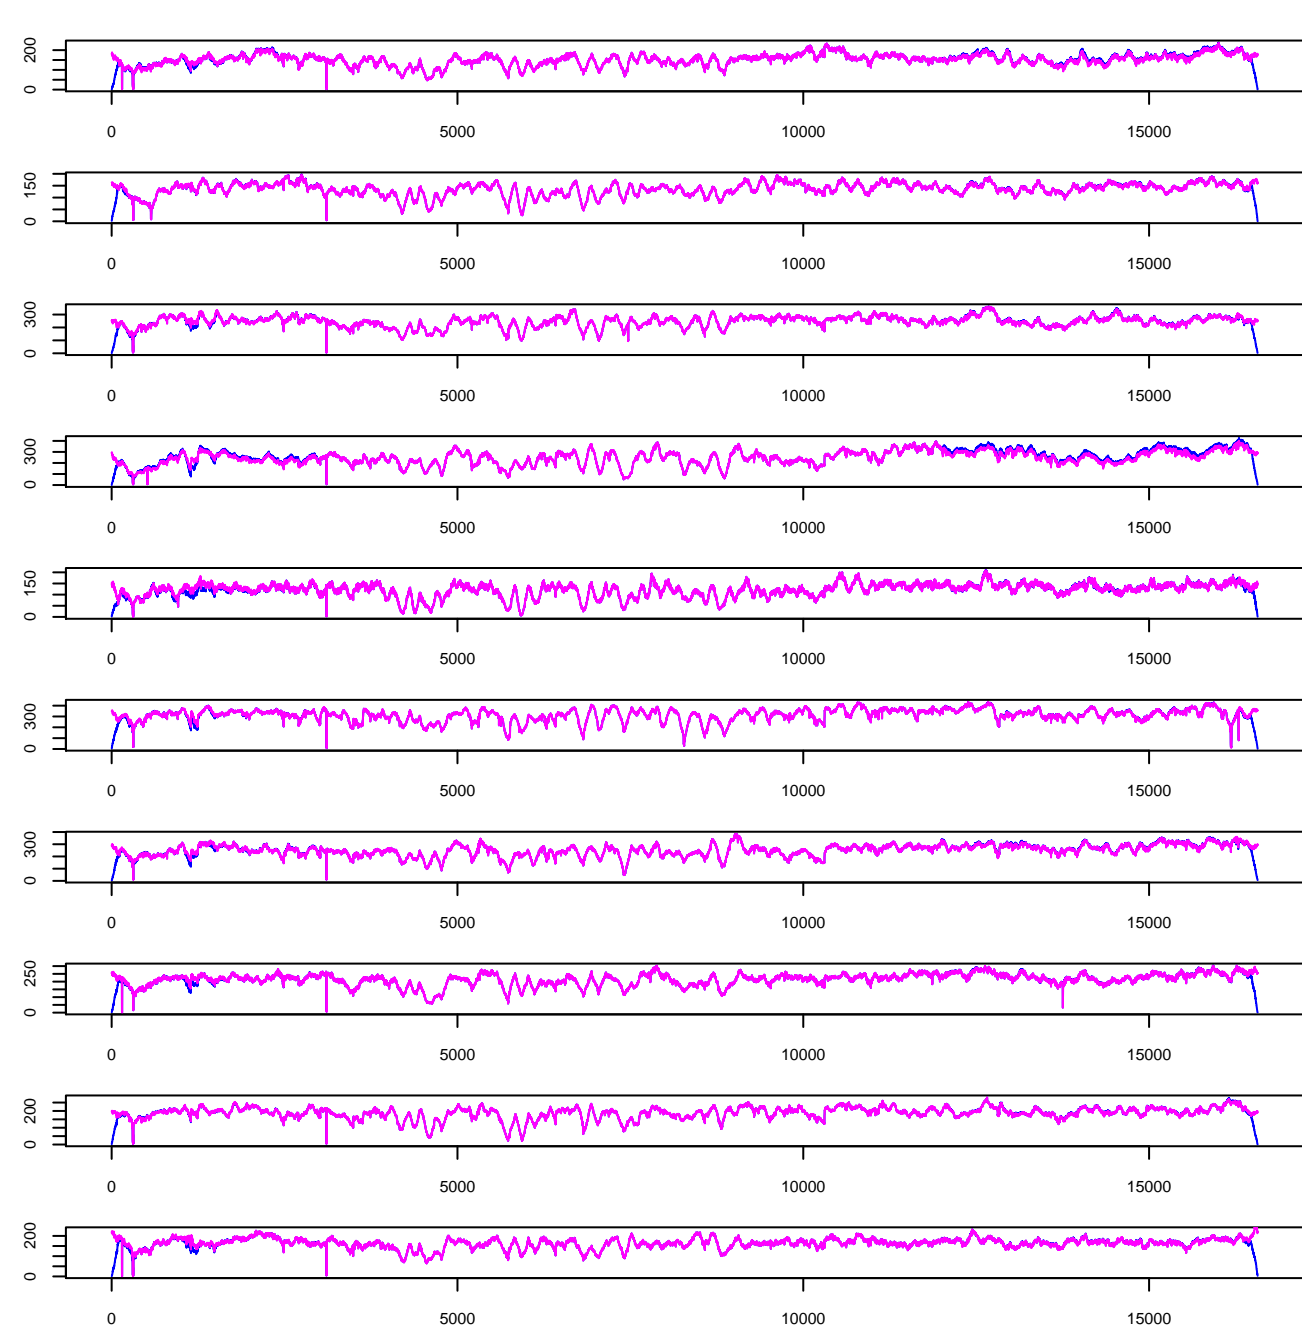

Supplement: Supplementary file 1 [file 1 › S8_Fig.pdf]

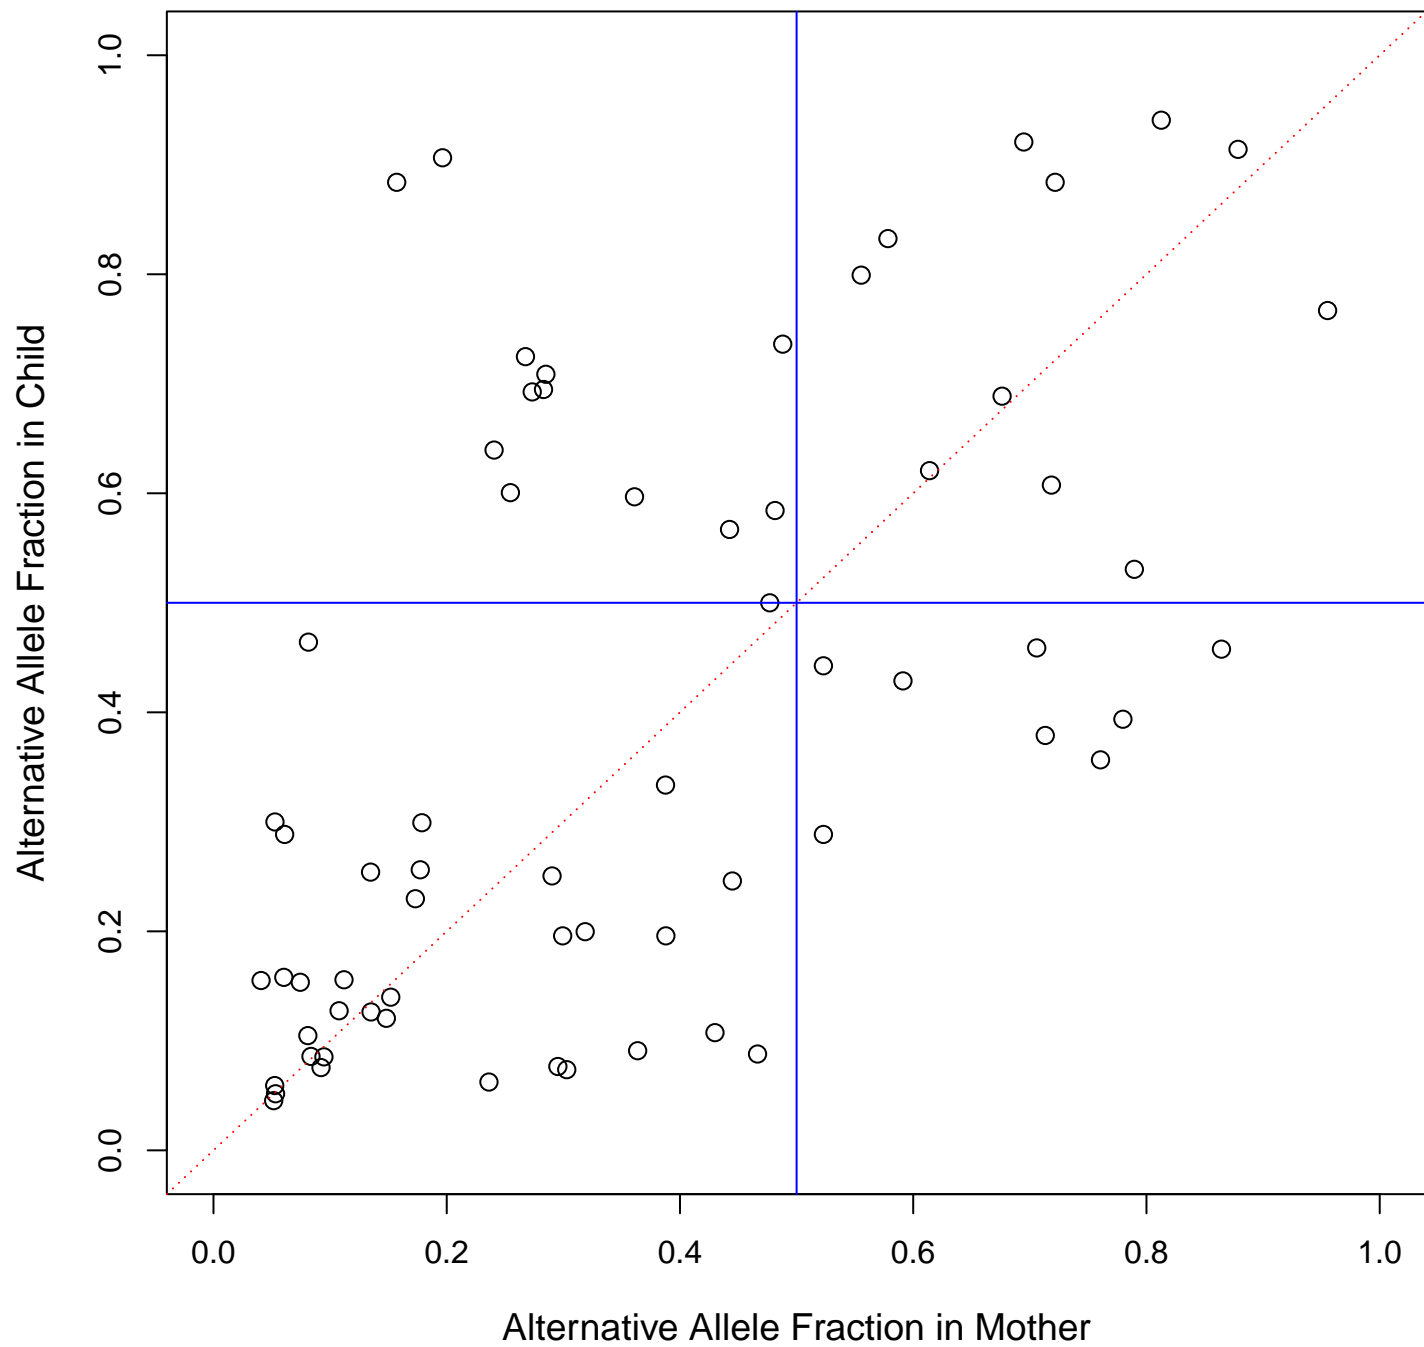

Supplement: Supplementary file 1 [file 1 › S9_Fig.pdf]

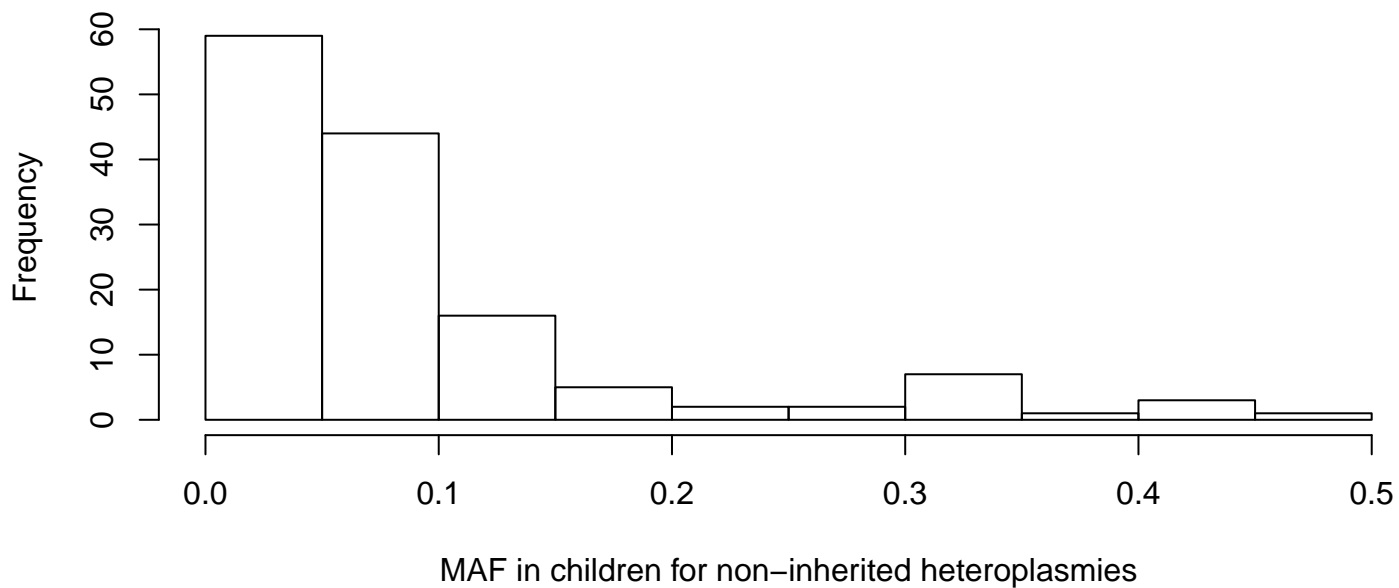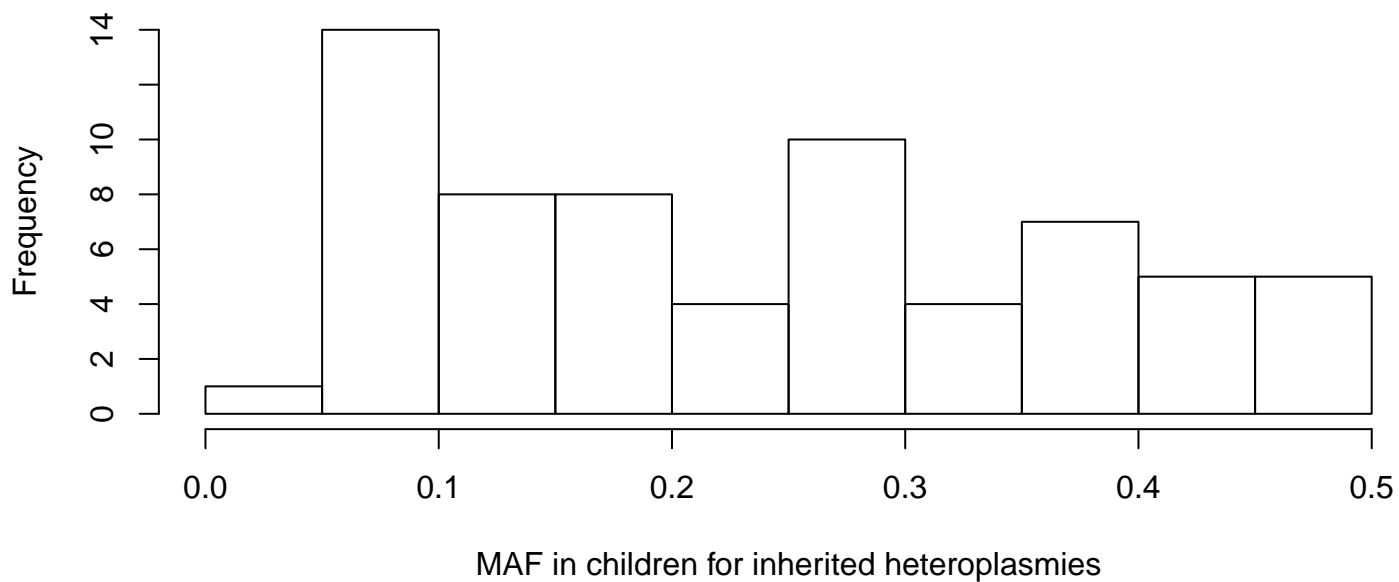

Supplement: Supplementary file 1 [file 1 › S10_Fig.pdf]
